# Supplementary material for: Unveiling the HER potential of TM-substituted PdTe 2 monolayers: a first-principles study
Source: Royal Society of Chemistry journal article supplement (doi:10.1039/d5cp03544a), 2025-12-17
Supplement: d5cp03544a1.pdf [file d5cp03544a1.pdf]

## Unveiling the HER Potential of TM-Substituted PdTe<sub>2</sub> Monolayers: A First-Principles Study

Poonam Parkar<sup>a</sup>, Ajay Chaudhari<sup>a\*</sup>, Brahmananda Chakraborty<sup>b,c\*</sup>

<sup>a</sup>Department of Physics, The Institute of Science, Dr. Homi Bhabha State University, Mumbai 400032, India.

<sup>b</sup>High Pressure and Synchrotron Radiation Physics Division, Bhabha Atomic Research Centre, Bombay, Mumbai, India, 40085

<sup>c</sup>Homi Bhabha National Institute, Mumbai-400094

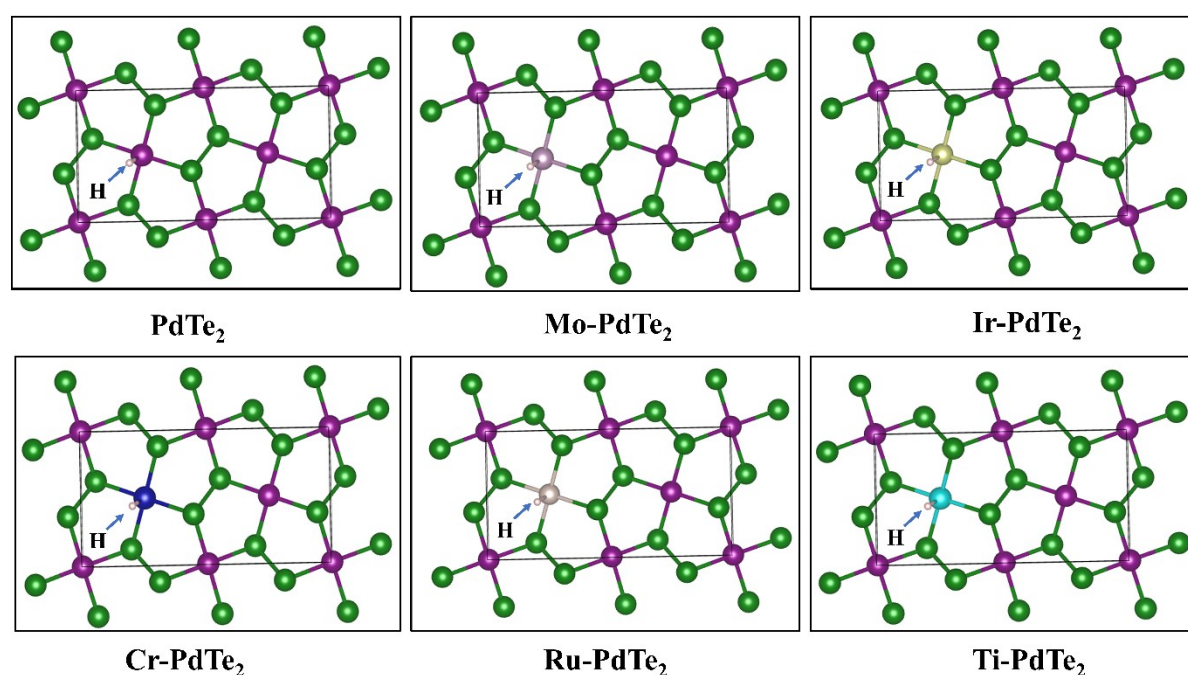

**Figure S1:** Optimized Geometry of H-adsorbed PdTe<sub>2</sub> and its derivatives.

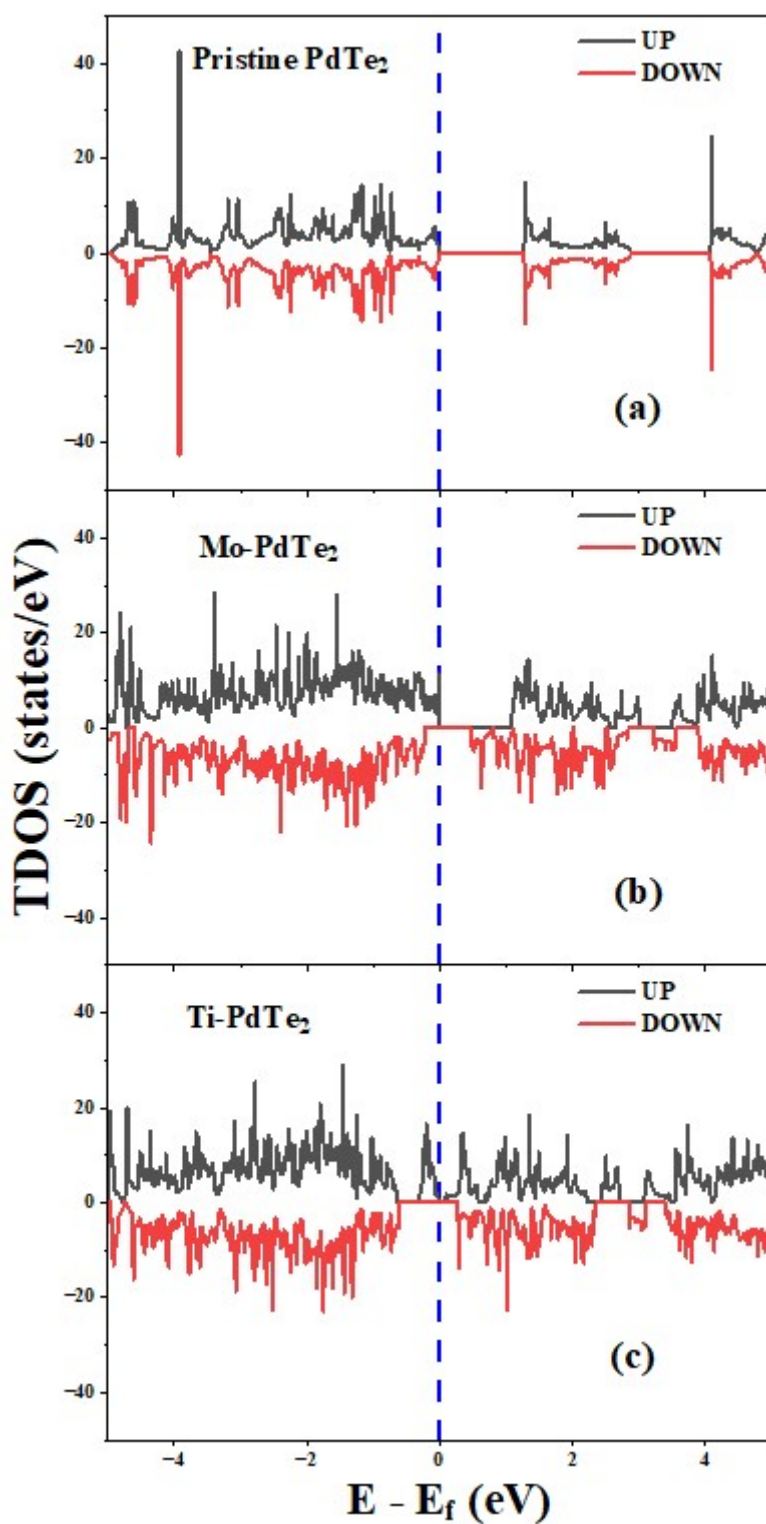

**Figure S2:** TDOS of pristine PdTe<sub>2</sub> and metal substituted PdTe<sub>2</sub> systems. (a) Pristine PdTe<sub>2</sub> (b) Mo-doped PdTe<sub>2</sub> (c) Ti-doped PdTe<sub>2</sub>. The spin-up and spin-down channels are shown for each system. The Fermi level is set to 0 eV (indicated by the blue dashed line). Doping significantly modifies the electronic structure, particularly near the Fermi level, indicating potential changes in electronic and catalytic properties.

**Table S1.** Formation energy per atom for pristine and transition-metal-doped PdTe<sub>2</sub> monolayers.

| System            | Formation Energy (eV) |
|-------------------|-----------------------|
| PdTe <sub>2</sub> | -0.72                 |
| Mo                | 2.40                  |
| Ti                | 0.43                  |
| Cr                | 3.23                  |
| Ir                | -0.82                 |
| Ru                | -0.50                 |

**Table S2.** Adsorption energy and overpotential for hydrogen atom adsorbed at different positions (A–E) on the pristine PdTe<sub>2</sub> surface.

| Position of H atom | Adsorption energy (eV) | Overpotential (V) |
|--------------------|------------------------|-------------------|
| A                  | 1.14                   | 1.38              |
| B                  | 1.14                   | 1.38              |
| C                  | 1.14                   | 1.38              |
| D                  | 1.14                   | 1.38              |
| E                  | 1.14                   | 1.38              |

**Table S3.** Effect of Hubbard U on HER activity of doped PdTe<sub>2</sub>.

| System               | U parameter | Overpotential (V) | Adsorption Energy (eV) |
|----------------------|-------------|-------------------|------------------------|
| Mo-PdTe <sub>2</sub> | 0           | -0.05             | -0.29                  |
|                      | 1           | -0.08             | -0.32                  |
|                      | 2           | -0.11             | -0.35                  |
